# Supplementary material
Source: publisher site journal article supplement (https://www.spandidos-publications.com/3738/downloadSupplementary)
Supplement: Supplementary file 1 [file downloadSupplementary]

## Sheet: Table SI
Table SI. Characteristics of patients with dMMR CRC.
No	Age, years	Sex	Mode of treatment	Tumor location	Histology	UICC stage	Multiple CRC	Other LS-related cancer	Family history of CRC	Family history of LS-related cancer	Amsterdam criteria II	Revised Bethesda guidelines	MMR protein IHC result	MLH1 methylation	BRAF V600E IHC	BRAF V600E mutation	GTC/non-GTC	bona fide GTC	Genetic testing
1	86	Female	Surgery	Rectum	Low	I	Absent	Absent	Absent	Absent	No	No	PMS2/MLH1 loss	Positive	Negative	Positive	GTC	No	Not tested
2	89	Female	Surgery	Cecum	Low	I	Absent	Absent	Present	Absent	No	Yes	PMS2/MLH1 loss	Positive	Negative	Negative	GTC	No	Not tested
3	63	Female	Surgery	Transverse	Low	I	Present	Present	Absent	Present	No	Yes	PMS2/MLH1 loss	Positive	Negative	Negative	GTC	No	No mutation
4	83	Male	Endoscopic resection	Ascending	Low	0	Present	Present	Absent	Absent	No	Yes	PMS2/MLH1 loss	Positive	Negative	Negative	GTC	No	No mutation
5	75	Female	Surgery	Cecum	Low	IIA	Absent	Absent	Absent	Absent	No	No	PMS2/MLH1 loss	Positive	Undetermined	Positive	GTC	No	Not tested
6	72	Female	Surgery	Ascending	High	IIA	Absent	Absent	Absent	Absent	No	No	PMS2/MLH1 loss	Positive	Negative	Negative	GTC	No	Not tested
7	67	Male	Surgery	Ascending	Low	IIIB	Absent	Absent	Absent	Absent	No	No	PMS2/MLH1 loss	Negative	Negative	Negative	GTC	Yes	Not tested
8	70	Male	Surgery	Sigmoid	High	IIA	Absent	Absent	Absent	Absent	No	No	PMS2/MLH1 loss	Positive	Negative	Negative	GTC	No	No mutation
9	69	Male	Surgery	Transverse	High	I	Absent	Absent	Absent	Absent	No	No	PMS2/MLH1 loss	Negative	Negative	Negative	GTC	Yes	Not tested
10	84	Female	Surgery	Transverse	Low	IIA	Absent	Absent	Absent	Absent	No	No	PMS2/MLH1 loss	Positive	Negative	Negative	GTC	No	Not tested
27	36	Female	Surgery	Sigmoid	Low	IVA	Absent	Absent	Absent	Present	Yes	Yes	PMS2/MLH1 loss	Negative	Negative	Negative	GTC	Yes	MLH1 mutation
11	77	Male	Surgery	Transverse	High	IIA	Absent	Absent	Absent	Absent	No	No	PMS2/MLH1 loss	Positive	Positive	Positive	Non-GTC	No	Not tested
12	71	Female	Surgery	Ascending	Mucinous	IIB	Absent	Absent	Absent	Present	No	No	PMS2/MLH1 loss	Positive	Positive	Positive	Non-GTC	No	Not tested
13	81	Female	Surgery	Ascending	Low	I	Absent	Absent	Absent	Absent	No	No	PMS2/MLH1 loss	Positive	Positive	Positive	Non-GTC	No	Not tested
14	76	Female	Surgery	Cecum	Low	IIIB	Absent	Absent	Absent	Absent	No	No	PMS2/MLH1 loss	Positive	Positive	Positive	Non-GTC	No	Not tested
15	81	Female	Surgery	Ascending	Mucinous	IIIB	Present	Absent	Present	Absent	No	Yes	PMS2/MLH1 loss	Positive	Positive	Negative	Non-GTC	No	Not tested
16	81	Male	Endoscopic resection	Cecum	Low	0	Present	Absent	Absent	Present	No	Yes	PMS2/MLH1 loss	Positive	Undetermined	Negative	Non-GTCa	No	Not tested
17	69	Female	Surgery	Ascending	Low	I	Absent	Absent	Absent	Present	No	No	PMS2/MLH1 loss	Positive	Positive	Positive	Non-GTC	No	Not tested
18	84	Male	Surgery	Ascending	Low	3b	Absent	Absent	Absent	Present	No	No	PMS2/MLH1 loss	Positive	Positive	Positive	Non-GTC	No	Not tested
19	73	Male	Endoscopic resection	Ascending	Low	0	Absent	Absent	Absent	Absent	No	No	PMS2/MLH1 loss	Positive	Positive	Positive	Non-GTC	No	Not tested
20	59	Male	Endoscopic resection	Transverse	Low	I	Present	Absent	Absent	Absent	No	Yes	PMS2/MLH1 loss	Positive	Positive	Positive	Non-GTC	No	Not tested
21	61	Male	Surgery	Ascending	High	IIIC	Absent	Absent	Absent	Present	No	No	PMS2/MLH1 loss	Positive	Positive	Positive	Non-GTC	No	Not tested
22	61	Female	Endoscopic resection	Cecum	Mucinous	I	Absent	Absent	Present	Present	No	Yes	PMS2/MLH1 loss	Positive	Positive	Positive	Non-GTC	No	Not tested
23	64	Female	Endoscopic resection	Cecum	Low	0	Absent	Absent	Absent	Absent	No	No	PMS2/MLH1 loss	Positive	Positive	Positive	Non-GTC	No	Not tested
24	64	Male	Surgery	Transverse	Mucinous	I	Absent	Absent	Present	Absent	No	No	PMS2/MLH1 loss	Positive	Positive	Positive	Non-GTC	No	Not tested
25	80	Female	Surgery	Ascending	Medullary	IIA	Absent	Absent	Absent	Absent	No	No	PMS2/MLH1 loss	Positive	Positive	Negative	Non-GTC	No	Not tested
26	83	Female	Surgery	Ascending	Low	IIA	Absent	Absent	Absent	Present	No	No	PMS2/MLH1 loss	Positive	Positive	Positive	Non-GTC	No	Not tested
28	62	Male	Surgery	Rectum	Low	I	Present	Absent	Present	Absent	No	Yes	PMS2 loss	Not tested	Not tested	Not tested	GTC	Yes	Not tested
29	70	Female	Surgery	Ascending	High	IIA	Absent	Present	Absent	Absent	No	Yes	PMS2 loss	Negative	Negative	Negative	GTC	Yes	No mutation
30	43	Female	Endoscopic resection	Transverse	Low	0	Present	Present	Present	Present	Yes	Yes	MSH6/MSH2 loss	Negative	Undetermined	Negative	GTC	Yes	Not tested
31	68	Female	Endoscopic resection	Sigmoid	Low	I	Present	Present	Present	Present	No	Yes	MSH6/MSH2 loss	Negative	Negative	Negative	GTC	Yes	No mutation
32	48	Female	Surgery	Rectum	Low	I	Present	Absent	Absent	Absent	No	Yes	MSH6/MSH2 loss	Negative	Negative	Negative	GTC	Yes	MSH2 mutation
33	64	Male	Surgery	Rectum	Low	IIIB	Absent	Absent	Present	Absent	No	Yes	MSH6 loss	Not tested	Negative	Not tested	GTC	Yes	No mutation
34	73	Male	Surgery	Rectum	Low	IIIB	Absent	Absent	Present	Absent	No	No	MSH6 loss	Negative	Negative	Negative	GTC	Yes	Not tested
a, tumor arose within a SSL and thus considered to be sporadic; SSL, sessile serrated lesion; dMMR, deficient mismatch repair; CRC, colorectal cancer; UICC, Union for International Cancer Control; LS, Lynch syndrome; MMR, mismatch repair; IHC, immunohistochemistry; GTC, genetic testing candidate; PMS2, mismatch repair endonuclease PMS2; MLH1, DNA mismatch repair protein Mlh1; MSH6, DNA mismatch r…

## Sheet: Table SII
Table SII. Association between BRAF V600E IHC and mutational analyses.
Mutational analysis	IHC
	Positive	Undetermined	Negative
Positive	13	1	1
Negative	2	2	13
IHC, immunohistochemistry.

## Sheet: Table SIII
Table SIII. MLH1 promoter methylation in dMMR CRCs.
Patient characteristics	MLH1 promoter methylation
	Methylated, n (%)	Unmethylated, n (%)
Total	24 (75.0)	8 (25.0)
Non-GTCs	16 (100.0)	0 (0.0)
GTCs with MLH1 loss	8 (72.7)	3 (27.3)
GTCs without MLH1 loss	0 (0.0)	5 (100.0)
dMMR, deficient mismatch repair; CRC, colorectal cancer; MLH1, DNA mismatch repair protein Mlh1; GTC, genetic testing candidate.

## Sheet: Table SIV
Table SIV. Characteristics of patients with dMMR tumors in an independent cohort of young-onset CRCs.
Number	Age, years	Sex	Mode of obtaining tissue	Tumor location	Histology	UICC stage	Multiple CRC	Other LS-related cancer	Family history of CRC	Family history of LS-related cancer	Amsterdam criteria II	Revised Bethesda guidelines	MMR protein IHC result	BRAF V600E IHC
1	48	Female	Biopsy	Ascending	Low	IIIB	Absent	Absent	Present	Absent	No	Yes	PMS2/MLH1 loss	Negative
2	41	Male	Surgery	Descending	Low	IIC	Absent	Absent	Present	Absent	Yes	Yes	MSH6 loss	Not tested
3	44	Male	Surgery	Transverse	Low	I	Absent	Absent	Absent	Present	No	Yes	PMS2/MSH6 loss	Not tested
4	43	Male	Endoscopic resection	Ascending	Low	I	Absent	Absent	Present	Present	No	Yes	MSH6 loss	Not tested
5	49	Female	Surgery	Rectum	Low	I	Absent	Absent	Absent	Absent	No	Yes	MSH6/MSH2 loss	Not tested
6	29	Male	Surgery	Cecum	High	IIA	Absent	Absent	Present	Absent	Yes	Yes	PMS2/MLH1 loss	Negative
7	44	Female	Biopsy	Rectum	Low	IVB	Absent	Present	Absent	Absent	No	Yes	PMS2 loss	Not tested
8	32	Male	Surgery	Ascending	High	IIIB	Absent	Absent	Present	Present	Yes	Yes	PMS2/MLH1 loss	Negative
9	39	Male	Surgery	Ascending	High	IIIB	Present	Absent	Absent	Absent	No	Yes	PMS2/MLH1 loss	Positive
10	35	Female	Surgery	Ascending	Low	IIA	Absent	Absent	Present	Absent	Yes	Yes	PMS2 loss	Not tested
dMMR, deficient mismatch repair; CRC, colorectal cancer; UICC, Union for International Cancer Control; LS, Lynch syndrome; MMR, mismatch repair; IHC, immunohistochemistry; PMS2, mismatch repair endonuclease PMS2; MLH1, DNA mismatch repair protein Mlh1; MSH6, DNA mismatch repair protein MSH6; MSH2, DNA mismatch repair protein Msh2.
